# Supplementary material for: Examining the Role of Physical Activity Interventions in Modulating Androgens and Cardiovascular Health in Postmenopausal Women: A Narrative Review
Source: PubMed Central journal article supplement — CJC Open. 2022 Nov 9;5(1):54–71. doi: 10.1016/j.cjco.2022.10.008 (PMC9869362; doi:10.1016/j.cjco.2022.10.008), 2022-11-09

## SUPPLEMENTARY MATERIAL

**Supplemental Table S1-4:** Detailed Search Strategy

| <b>Supplemental Table S1. Medline Search Strategy</b><br>(MEDLINE(R) ALL 1946 to August 07, 2020 conducted Aug 20, 2020 via Ovid) |                                                                                                                                                                                                                                                                                                                     |                |
|-----------------------------------------------------------------------------------------------------------------------------------|---------------------------------------------------------------------------------------------------------------------------------------------------------------------------------------------------------------------------------------------------------------------------------------------------------------------|----------------|
| <b>#</b>                                                                                                                          | <b>Searches</b>                                                                                                                                                                                                                                                                                                     | <b>Results</b> |
| 1                                                                                                                                 | exp Menopause/                                                                                                                                                                                                                                                                                                      | 57109          |
| 2                                                                                                                                 | (menopaus* or premenopaus* or pre-menopaus* or perimenopaus* or perimenopaus* or postmenopaus* or post-menopaus*).ti,ab,kf.                                                                                                                                                                                         | 101446         |
| 3                                                                                                                                 | ((middleage? or middle-age? or midlife or mid-life or older or elder* or aged or senior) adj3 (wom#n or female?)).ti,ab,kf.                                                                                                                                                                                         | 136289         |
| 4                                                                                                                                 | (Middle Aged/ or exp Aged/ or geriatric*.ti,ab,kf.) and (wom#n or female?).ti,ab,kf.                                                                                                                                                                                                                                | 757441         |
| 5                                                                                                                                 | or/1-4                                                                                                                                                                                                                                                                                                              | 861634         |
| 6                                                                                                                                 | exp Androgens/                                                                                                                                                                                                                                                                                                      | 95348          |
| 7                                                                                                                                 | exp testosterone congeners/                                                                                                                                                                                                                                                                                         | 89046          |
| 8                                                                                                                                 | (androgen* or dehydroepiandrosterone* or androstenedione* or testosterone*).ti,ab,kf.                                                                                                                                                                                                                               | 150626         |
| 9                                                                                                                                 | (sex adj2 (hormon* or steroid?)).ti,ab,kf.                                                                                                                                                                                                                                                                          | 34288          |
| 10                                                                                                                                | or/6-9                                                                                                                                                                                                                                                                                                              | 194214         |
| 11                                                                                                                                | exp exercise/ or exp exercise therapy/ or exp sports/ or muscle strength/ or exp physical endurance/ or physical exertion/ or physical fitness/                                                                                                                                                                     | 371736         |
| 12                                                                                                                                | (exercis* or exertion or train* or conditioning or strengthen* or fitness or aerobic* or walk* or gym? or sport* or running or jog? or jogging or pilates or yoga or bicycl* or bike* or biking or swim* or swimming or rollerblad* or weight lift* or (physical* adj1 activ*) or (strength adj2 train?)).ti,ab,kf. | 1336600        |
| 13                                                                                                                                | or/11-12                                                                                                                                                                                                                                                                                                            | 1431179        |
| 14                                                                                                                                | 5 and 10 and 13                                                                                                                                                                                                                                                                                                     | 924            |
| 15                                                                                                                                | limit 14 to (no language specified or (english or french or multilingual or undetermined))                                                                                                                                                                                                                          | 886            |

|                                                                                                                                                                                                                                                                                                                                                    |
|----------------------------------------------------------------------------------------------------------------------------------------------------------------------------------------------------------------------------------------------------------------------------------------------------------------------------------------------------|
| <p><b>Supplemental Table S2. Cochrane Central Register of Controlled Trials and Cochrane Database of Systematic Reviews Search Histories</b><br/>(EBM Reviews - Cochrane Central Register of Controlled Trials July 2020, EBM Reviews - Cochrane Database of Systematic Reviews 2005 to August 07, 2020; both conducted Aug 10, 2020 via Ovid)</p> |
|----------------------------------------------------------------------------------------------------------------------------------------------------------------------------------------------------------------------------------------------------------------------------------------------------------------------------------------------------|

| #  | Searches                                                                                                                                                                                                                                                                                                         | Results |
|----|------------------------------------------------------------------------------------------------------------------------------------------------------------------------------------------------------------------------------------------------------------------------------------------------------------------|---------|
| 1  | exp Menopause/                                                                                                                                                                                                                                                                                                   | 6906    |
| 2  | (menopaus* or premenopaus* or pre-menopaus* or perimenopaus* or peri-menopaus* or postmenopaus* or post-menopaus*).ti,ab.                                                                                                                                                                                        | 28546   |
| 3  | ((middleage? or middle-age? or midlife or mid-life or older or elder* or aged or senior) adj3 (wom#n or female?)).ti,ab.                                                                                                                                                                                         | 26910   |
| 4  | (Middle Aged/ or exp Aged/ or geriatric*.ti,ab.) and (wom#n or female?).ti,ab.                                                                                                                                                                                                                                   | 48049   |
| 5  | or/1-4                                                                                                                                                                                                                                                                                                           | 85607   |
| 6  | exp Androgens/                                                                                                                                                                                                                                                                                                   | 3835    |
| 7  | exp testosterone congeners/                                                                                                                                                                                                                                                                                      | 3746    |
| 8  | (androgen* or dehydroepiandrosterone* or androstenedione* or testosterone*).ti,ab.                                                                                                                                                                                                                               | 12285   |
| 9  | (sex adj2 (hormon* or steroid*)).ti,ab.                                                                                                                                                                                                                                                                          | 2569    |
| 10 | or/6-9                                                                                                                                                                                                                                                                                                           | 14268   |
| 11 | exp exercise/ or exp exercise therapy/ or exp sports/ or muscle strength/ or exp physical endurance/ or physical exertion/ or physical fitness/                                                                                                                                                                  | 39462   |
| 12 | (exercis* or exertion or train* or conditioning or strengthen* or fitness or aerobic* or walk* or gym? or sport* or running or jog? or jogging or pilates or yoga or bicycl* or bike* or biking or swim* or swimming or rollerblad* or weight lift* or (physical* adj1 activ*) or (strength adj2 train*)).ti,ab. | 208267  |
| 13 | or/11-12                                                                                                                                                                                                                                                                                                         | 212058  |
| 14 | 5 and 10 and 13                                                                                                                                                                                                                                                                                                  | 241     |
| 15 | remove duplicates from 14                                                                                                                                                                                                                                                                                        | 238     |

### Supplemental Table S3. Embase Search History

(Embase Classic+Embase 1947 to 2020 August 07 conducted Aug 10, 2020 via Ovid)

| #  | Searches                                                                                                                     | Results |
|----|------------------------------------------------------------------------------------------------------------------------------|---------|
| 1  | exp "menopause and climacterium"/                                                                                            | 127934  |
| 2  | (menopaus* or premenopaus* or pre-menopaus* or perimenopaus* or peri-menopaus* or postmenopaus* or post-menopaus*).ti,ab,kw. | 152797  |
| 3  | ((middleage? or middle-age? or midlife or mid-life or older or elder* or aged or senior) adj3 (wom#n or female?)).ti,ab,kw.  | 194025  |
| 4  | (middle aged/ or exp aged/ or geriatric*.ti,ab,kw.) and (wom#n or female?).ti,ab,kw.                                         | 738122  |
| 5  | or/1-4                                                                                                                       | 964179  |
| 6  | exp androgen/                                                                                                                | 213450  |
| 7  | (androgen* or dehydroepiandrosterone* or androstenedione* or testosterone*).ti,ab,kw.                                        | 203872  |
| 8  | (sex adj2 (hormon* or steroid*)).ti,ab,kw.                                                                                   | 44625   |
| 9  | or/6-8                                                                                                                       | 298534  |
| 10 | exp exercise/ or exp kinesiotherapy/ or exp sport/ or muscle strength/ or endurance/ or fitness/                             | 604389  |

|    |                                                                                                                                                                                                                                                                                                                     |         |
|----|---------------------------------------------------------------------------------------------------------------------------------------------------------------------------------------------------------------------------------------------------------------------------------------------------------------------|---------|
| 11 | (exercis* or exertion or train* or conditioning or strengthen* or fitness or aerobic* or walk* or gym? or sport* or running or jog? or jogging or pilates or yoga or bicycl* or bike* or biking or swim* or swimming or rollerblad* or weight lift* or (physical* adj1 activ*) or (strength adj2 train*)).ti,ab,kw. | 1816995 |
| 12 | or/10-11                                                                                                                                                                                                                                                                                                            | 1982391 |
| 13 | 5 and 9 and 12                                                                                                                                                                                                                                                                                                      | 1658    |
| 14 | limit 13 to (english or french)                                                                                                                                                                                                                                                                                     | 1574    |

**Supplemental Table S4. CINAHL Search History**  
(Conducted Aug 10, 2020 from inception via EBSCOhost)

| #   | Query                                                                                                                                                                                                                                                       | Limiters/Expanders                                                                                                                 | Last Run Via                                                                                        | Results |
|-----|-------------------------------------------------------------------------------------------------------------------------------------------------------------------------------------------------------------------------------------------------------------|------------------------------------------------------------------------------------------------------------------------------------|-----------------------------------------------------------------------------------------------------|---------|
| S17 | S4 AND S8 AND S15                                                                                                                                                                                                                                           | Expanders - Apply related words; Apply equivalent subjects<br>Narrow by<br>Language: - english<br>Search modes -<br>Boolean/Phrase | Interface - EBSCOhost<br>Research Databases<br>Search Screen - Advanced Search<br>Database - CINAHL | 249     |
| S16 | S4 AND S8 AND S15                                                                                                                                                                                                                                           | Expanders - Apply related words; Apply equivalent subjects<br>Search modes -<br>Boolean/Phrase                                     | Interface - EBSCOhost<br>Research Databases<br>Search Screen - Advanced Search<br>Database - CINAHL | 254     |
| S15 | S9 OR S10 OR S11 OR S12 OR S13 OR S14                                                                                                                                                                                                                       | Expanders - Apply related words; Apply equivalent subjects<br>Search modes -<br>Boolean/Phrase                                     | Interface - EBSCOhost<br>Research Databases<br>Search Screen - Advanced Search<br>Database - CINAHL | 576,438 |
| S14 | TI ( (exercis* OR exertion OR train* OR conditioning OR strengthen* OR fitness OR aerobic* OR walk* OR gym# OR sport* OR running OR jog# OR jogging OR pilates OR yoga OR bicycl* OR bike* OR biking OR swim* OR swimming OR rollerblad* OR weight lift* OR | Expanders - Apply related words; Apply equivalent subjects<br>Search modes -<br>Boolean/Phrase                                     | Interface - EBSCOhost<br>Research Databases<br>Search Screen - Advanced Search<br>Database - CINAHL | 492,283 |

|     |                                                                                                                                                                                                                                                                                                                                                                                                                   |                                                                                                      |                                                                                                        |         |
|-----|-------------------------------------------------------------------------------------------------------------------------------------------------------------------------------------------------------------------------------------------------------------------------------------------------------------------------------------------------------------------------------------------------------------------|------------------------------------------------------------------------------------------------------|--------------------------------------------------------------------------------------------------------|---------|
|     | (physical* N1 activ*)<br>OR (strength N2 train*)<br>) OR AB ( (exercis* OR<br>exertion OR train* OR<br>conditioning OR<br>strengthen* OR fitness<br>OR aerobic* OR walk*<br>OR gym# OR sport* OR<br>running OR jog# OR<br>jogging OR pilates OR<br>yoga OR bicycl* OR<br>bike* OR biking OR<br>swim* OR swimming<br>OR rollerblad* OR<br>weight lift* OR<br>(physical* N1 activ*)<br>OR (strength N2 train*)<br>) |                                                                                                      |                                                                                                        |         |
| S13 | (MH "Physical<br>Fitness+")                                                                                                                                                                                                                                                                                                                                                                                       | Expanders - Apply<br>related words; Apply<br>equivalent subjects<br>Search modes -<br>Boolean/Phrase | Interface - EBSCOhost<br>Research Databases<br>Search Screen - Advanced<br>Search<br>Database - CINAHL | 18,341  |
| S12 | (MH "Muscle<br>Strength+") OR (MH<br>"Exertion+")                                                                                                                                                                                                                                                                                                                                                                 | Expanders - Apply<br>related words; Apply<br>equivalent subjects<br>Search modes -<br>Boolean/Phrase | Interface - EBSCOhost<br>Research Databases<br>Search Screen - Advanced<br>Search<br>Database - CINAHL | 113,083 |
| S11 | (MH "Sports+")                                                                                                                                                                                                                                                                                                                                                                                                    | Expanders - Apply<br>related words; Apply<br>equivalent subjects<br>Search modes -<br>Boolean/Phrase | Interface - EBSCOhost<br>Research Databases<br>Search Screen - Advanced<br>Search<br>Database - CINAHL | 80,389  |
| S10 | (MH "Therapeutic<br>Exercise+")                                                                                                                                                                                                                                                                                                                                                                                   | Expanders - Apply<br>related words; Apply<br>equivalent subjects<br>Search modes -<br>Boolean/Phrase | Interface - EBSCOhost<br>Research Databases<br>Search Screen - Advanced<br>Search<br>Database - CINAHL | 54,482  |
| S9  | (MH "Exercise+")                                                                                                                                                                                                                                                                                                                                                                                                  | Expanders - Apply<br>related words; Apply<br>equivalent subjects                                     | Interface - EBSCOhost<br>Research Databases<br>Search Screen - Advanced                                | 113,106 |

|    |                                                                                                                                                                                                                                                    |                                                                                             |                                                                                                     |        |
|----|----------------------------------------------------------------------------------------------------------------------------------------------------------------------------------------------------------------------------------------------------|---------------------------------------------------------------------------------------------|-----------------------------------------------------------------------------------------------------|--------|
|    |                                                                                                                                                                                                                                                    | Search modes - Boolean/Phrase                                                               | Search Database - CINAHL                                                                            |        |
| S8 | S5 OR S6 OR S7                                                                                                                                                                                                                                     | Expanders - Apply related words; Apply equivalent subjects<br>Search modes - Boolean/Phrase | Interface - EBSCOhost<br>Research Databases<br>Search Screen - Advanced Search<br>Database - CINAHL | 19,764 |
| S7 | TI ( (sex N2 (hormon* or steroid*)) ) OR AB ( (sex N2 (hormon* or steroid*)) ) )                                                                                                                                                                   | Expanders - Apply related words; Apply equivalent subjects<br>Search modes - Boolean/Phrase | Interface - EBSCOhost<br>Research Databases<br>Search Screen - Advanced Search<br>Database - CINAHL | 3,690  |
| S6 | TI ( (androgen* OR dehydroepiandrosterone* OR androstenedione* OR testosterone*) ) OR AB ( (androgen* OR dehydroepiandrosterone* OR androstenedione* OR testosterone*) ) )                                                                         | Expanders - Apply related words; Apply equivalent subjects<br>Search modes - Boolean/Phrase | Interface - EBSCOhost<br>Research Databases<br>Search Screen - Advanced Search<br>Database - CINAHL | 14,249 |
| S5 | (MH "Androgens+")                                                                                                                                                                                                                                  | Expanders - Apply related words; Apply equivalent subjects<br>Search modes - Boolean/Phrase | Interface - EBSCOhost<br>Research Databases<br>Search Screen - Advanced Search<br>Database - CINAHL | 9,766  |
| S4 | S1 OR S2 OR S3                                                                                                                                                                                                                                     | Expanders - Apply related words; Apply equivalent subjects<br>Search modes - Boolean/Phrase | Interface - EBSCOhost<br>Research Databases<br>Search Screen - Advanced Search<br>Database - CINAHL | 83,984 |
| S3 | TI ( ((middleage# OR middle-age# OR midlife OR mid-life OR older OR elder* OR aged OR senior) N3 (wom?n OR female#)) ) OR AB ( ((middleage# OR middle-age# OR midlife OR mid-life OR older OR elder* OR aged OR senior) N3 (wom?n OR female#)) ) ) | Expanders - Apply related words; Apply equivalent subjects<br>Search modes - Boolean/Phrase | Interface - EBSCOhost<br>Research Databases<br>Search Screen - Advanced Search<br>Database - CINAHL | 52,907 |

|    |                                                                                                                                                                                                                                                  |                                                                                             |                                                                                                  |        |
|----|--------------------------------------------------------------------------------------------------------------------------------------------------------------------------------------------------------------------------------------------------|---------------------------------------------------------------------------------------------|--------------------------------------------------------------------------------------------------|--------|
| S2 | TI ( (menopaus* OR premenopaus* OR premenopaus* OR perimenopaus* OR perimenopaus* OR postmenopaus* OR postmenopaus*) ) OR AB ( (menopaus* OR premenopaus* OR premenopaus* OR perimenopaus* OR perimenopaus* OR postmenopaus* OR postmenopaus*) ) | Expanders - Apply related words; Apply equivalent subjects<br>Search modes - Boolean/Phrase | Interface - EBSCOhost Research Databases<br>Search Screen - Advanced Search<br>Database - CINAHL | 30,231 |
| S1 | (MH "Menopause+") OR (MH "Premenopause")                                                                                                                                                                                                         | Expanders - Apply related words; Apply equivalent subjects<br>Search modes - Boolean/Phrase | Interface - EBSCOhost Research Databases<br>Search Screen - Advanced Search<br>Database - CINAHL | 22,382 |

**Supplemental Figure S1:** A flow diagram of articles identified in the search

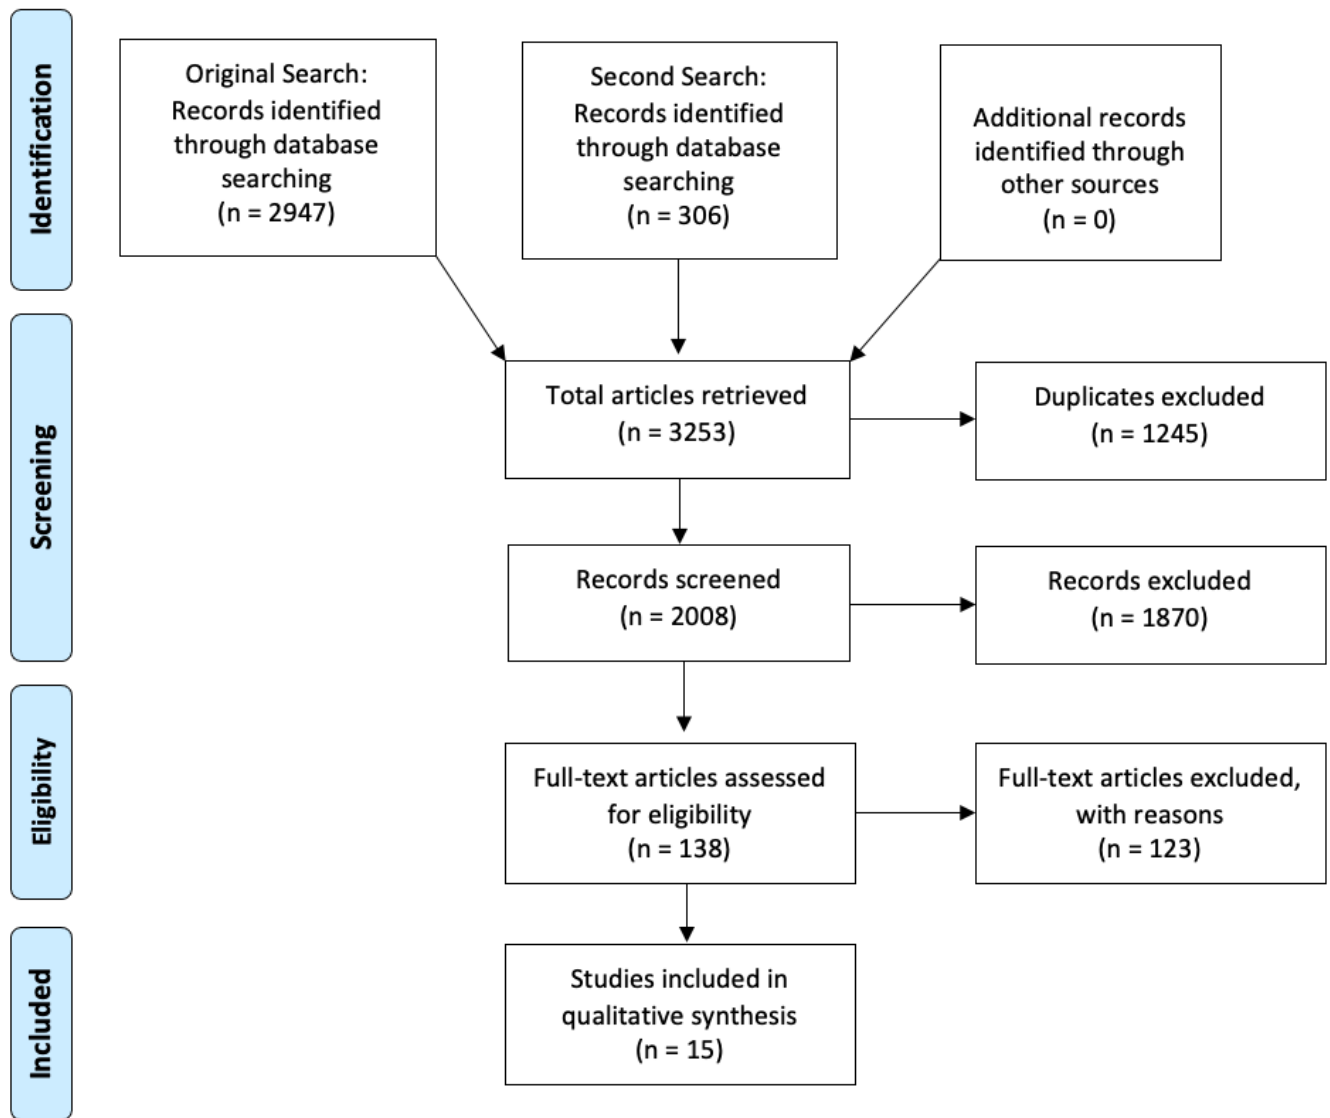

Supplement: mmc1.pdf [file mmc1.pdf]
